# Supplementary material for: Preparation, Characterization, and Application of Modified Starch/Chitosan/Sweet Orange Oil Microcapsules
Source: MDPI journal article supplement (doi:10.3390/foods11152306), 2022-08-02
Supplement: s1 [file s1]

Supplementary Materials

# Preparation, Characterization, and Application of Modified Starch/Chitosan/Sweet Orange Oil Microcapsules

UH5300

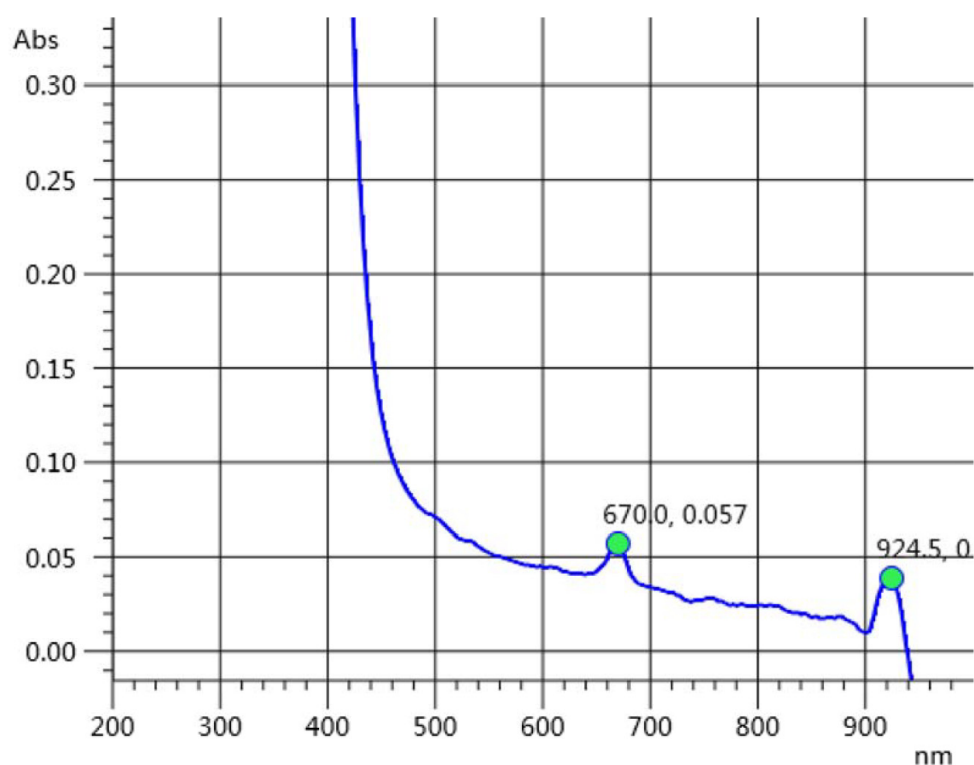

**Figure S1.** The Full scanning wavelength of SOEO.

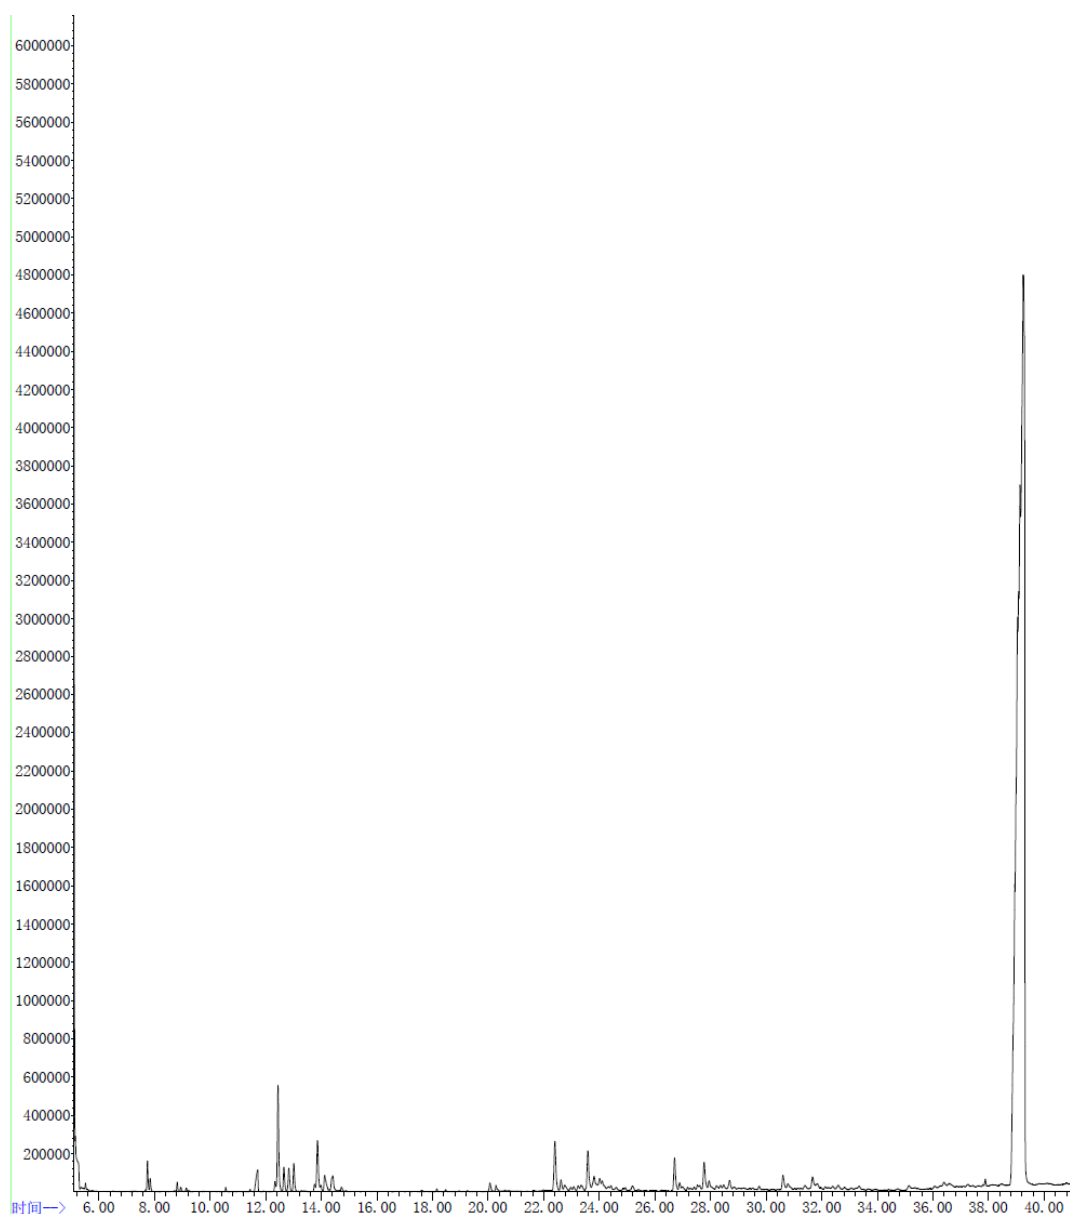

**Figure S2.** The chromatograms of SOEO

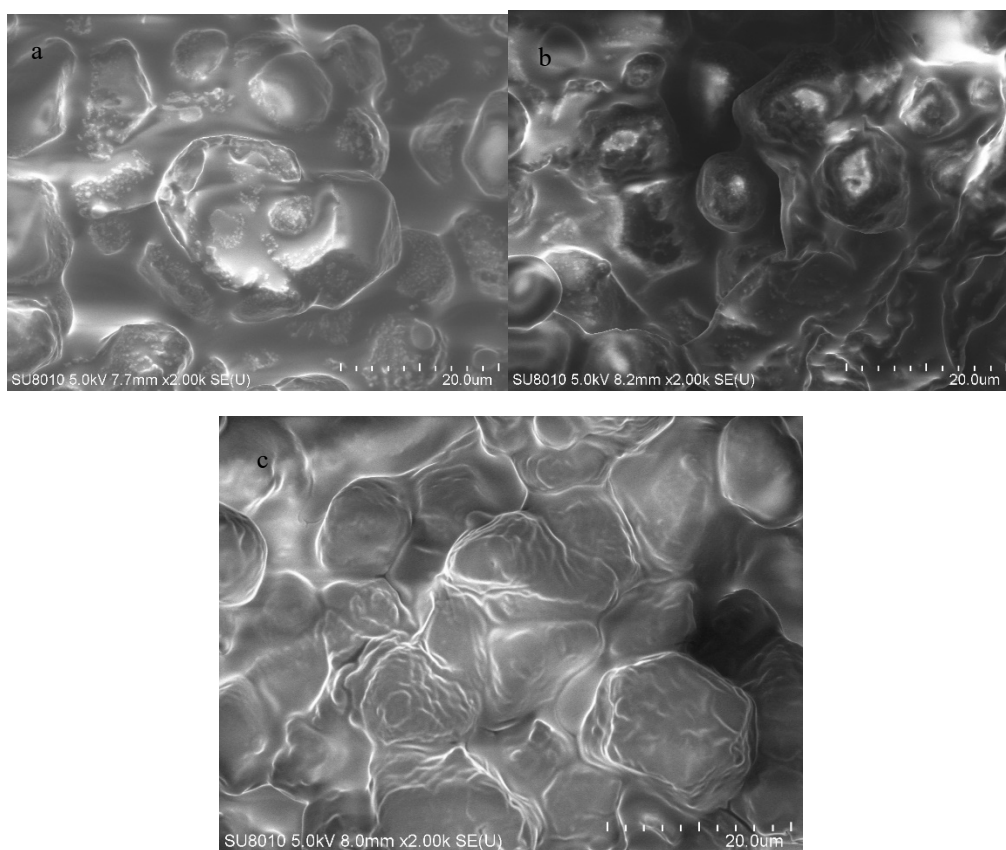

**Figure S3.** The Scanning electron microscopy of SOEO microcapsules: a: Group A microcapsules; b: Group B microcapsules; c: Group C microcapsules. All authors have read and agreed to the published version of the manuscript.
